# Supplementary figures and images for: The synthesis of imprinted polymers based on Fe3O4 nanomaterials and the recognition of proteins
Source: Royal Society of Chemistry journal article supplement (doi:10.1039/c5ay02510a), 2015-01-01

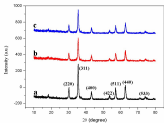

Supplement: c5ay02510a1.pdf [file c5ay02510a1.pdf]

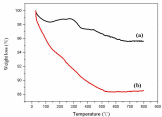

Supplement: c5ay02510a2.pdf [file c5ay02510a2.pdf]

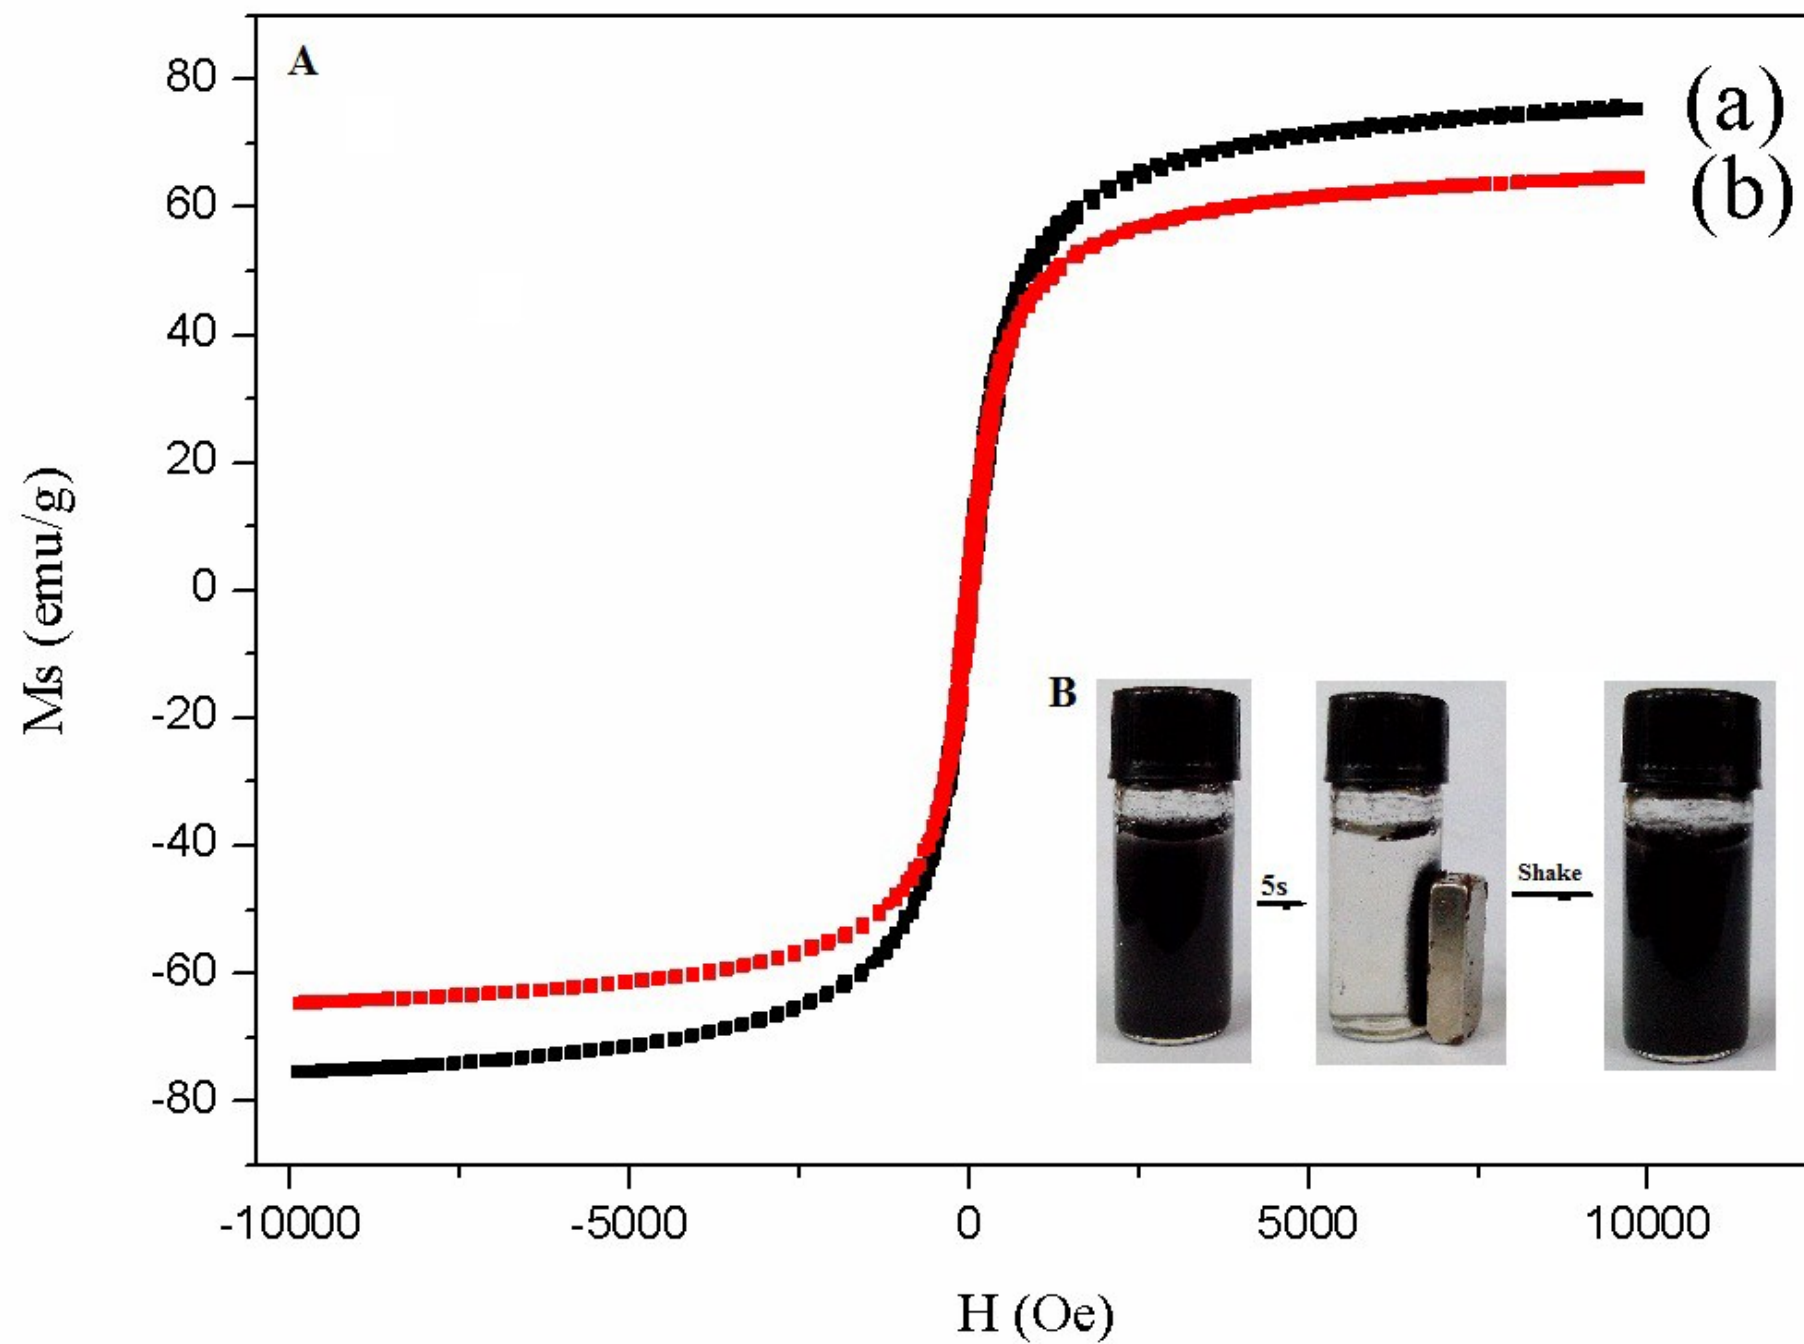

Supplement: c5ay02510a3.pdf [file c5ay02510a3.pdf]
